# Supplementary material
Source: PubMed Central journal article supplement (PMC4906329)
Supplement: supp_glw064_Table_S1_v3.pdf [file supp_glw064_Table_S1_v3.pdf]

# Supplemental Table 1

| Vehicle treated (days) | Rapamycin treated (days) | Note                         | Analysis          |
|------------------------|--------------------------|------------------------------|-------------------|
| 663                    | 755                      |                              | Figure 1A, 1B, 1C |
| 668                    | 822                      |                              | Figure 1A, 1B, 1C |
| 672                    | 857                      |                              | Figure 1A, 1B, 1C |
| 776                    | 915                      |                              | Figure 1A, 1B, 1C |
| 795                    | 920                      |                              | Figure 1A, 1B, 1C |
| 801                    | 930                      |                              | Figure 1A, 1B, 1C |
| 833                    | 955                      |                              | Figure 1A, 1B, 1C |
| 844                    | 965                      |                              | Figure 1A, 1B, 1C |
| 864                    | 971                      |                              | Figure 1A, 1B, 1C |
| 884                    | 1028                     |                              | Figure 1A, 1B, 1C |
| 910                    | 1099                     |                              | Figure 1A, 1B, 1C |
| 912                    | 1092                     | Alive                        | Figure 1A, 1B, 1C |
| 912                    | 1148                     |                              | Figure 1A, 1B, 1C |
| 934                    | 1151                     | Alive                        | Figure 1A, 1B, 1C |
| 938                    | 739                      | Dermatitis                   | Figure 1B, 1C     |
| 938                    | 804                      | Dermatitis                   | Figure 1B, 1C     |
| 941                    | 819                      | Dermatitis                   | Figure 1B, 1C     |
| 953                    | 774                      | Euthanized due to dermatitis | Figure 1C         |
| 966                    | 830                      | Euthanized due to dermatitis | Figure 1C         |
| 994                    | 830                      | Euthanized due to dermatitis | Figure 1C         |

**Table S1. Lifespans of mice receiving vehicle or rapamycin levels.** Lifespan data for Control and Rapamycin treated mice analyzed in this study. Mice listed as “Dermatitis” were included in the analysis for Figure 1B and 1C; Mice listed as “Euthanized due to dermatitis” were included in the analysis for Figure 1C only.
